# Supplementary material for: Elicitation of prior probability distributions for a proposed Bayesian randomized clinical trial of whole blood for trauma resuscitation
Source: PubMed Central journal article supplement — Transfusion. 2020 Jan 22;60(3):498–506. doi: 10.1111/trf.15675 (PMC7079110; doi:10.1111/trf.15675), 2020-01-22
Supplement: TRF-60-498-s001.pdf [file TRF-60-498-s001.pdf]

# Supplementary File 1: Screenshot of elicitation questions posed to participants using an online elicitation tool.

## Elicitation of experts' beliefs for the TROOP Trial

- Background Information
- Facility Information
- Question 1**
- Question 2
- Question 3
- SUBMIT

What is your estimate of 24-hour mortality rate for trauma patients with hemorrhagic shock receiving **standard component blood** therapy?

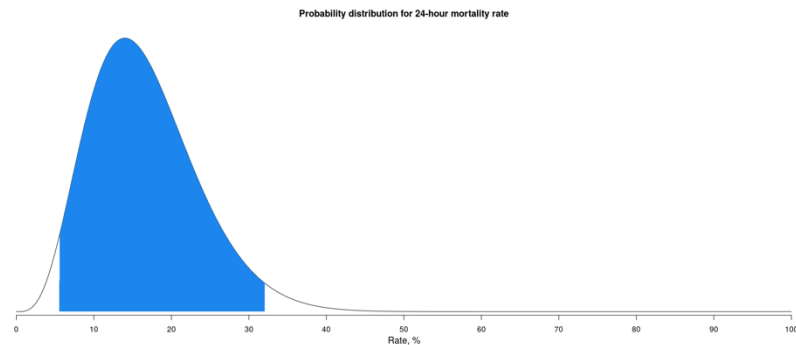

**Step 1:** Use this slider to set the position of YOUR estimate of the LOWER and UPPER plausible values for the 24-hour mortality rate for trauma patients with hemorrhagic shock receiving **standard component therapy**.

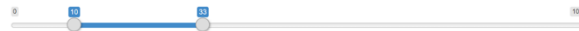

When you finish setting the lower and upper plausible values in Step 1, please click the below box to continue with Step 2.

Continue

**Step 2:** Use this slider to set the position of YOUR opinion of the MOST LIKELY value for the 24-hour mortality rate for trauma patients with hemorrhagic shock receiving **standard component therapy**.

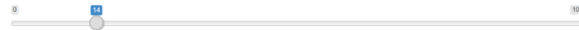

Press the PLOT button to show the distribution graph representing your belief. You can adjust the values until the graph best reflects your belief.

**PLOT**

When you are happy with the plot, continue with Question 2.
