# Supplementary figures and images for: Elicitation of prior probability distributions for a proposed Bayesian randomized clinical trial of whole blood for trauma resuscitation
Source: PubMed Central journal article supplement — Transfusion. 2020 Jan 22;60(3):498–506. doi: 10.1111/trf.15675 (PMC7079110; doi:10.1111/trf.15675), 2020-01-22

## Supplementary File 2: Evolution of responses from round 1 to round 2.

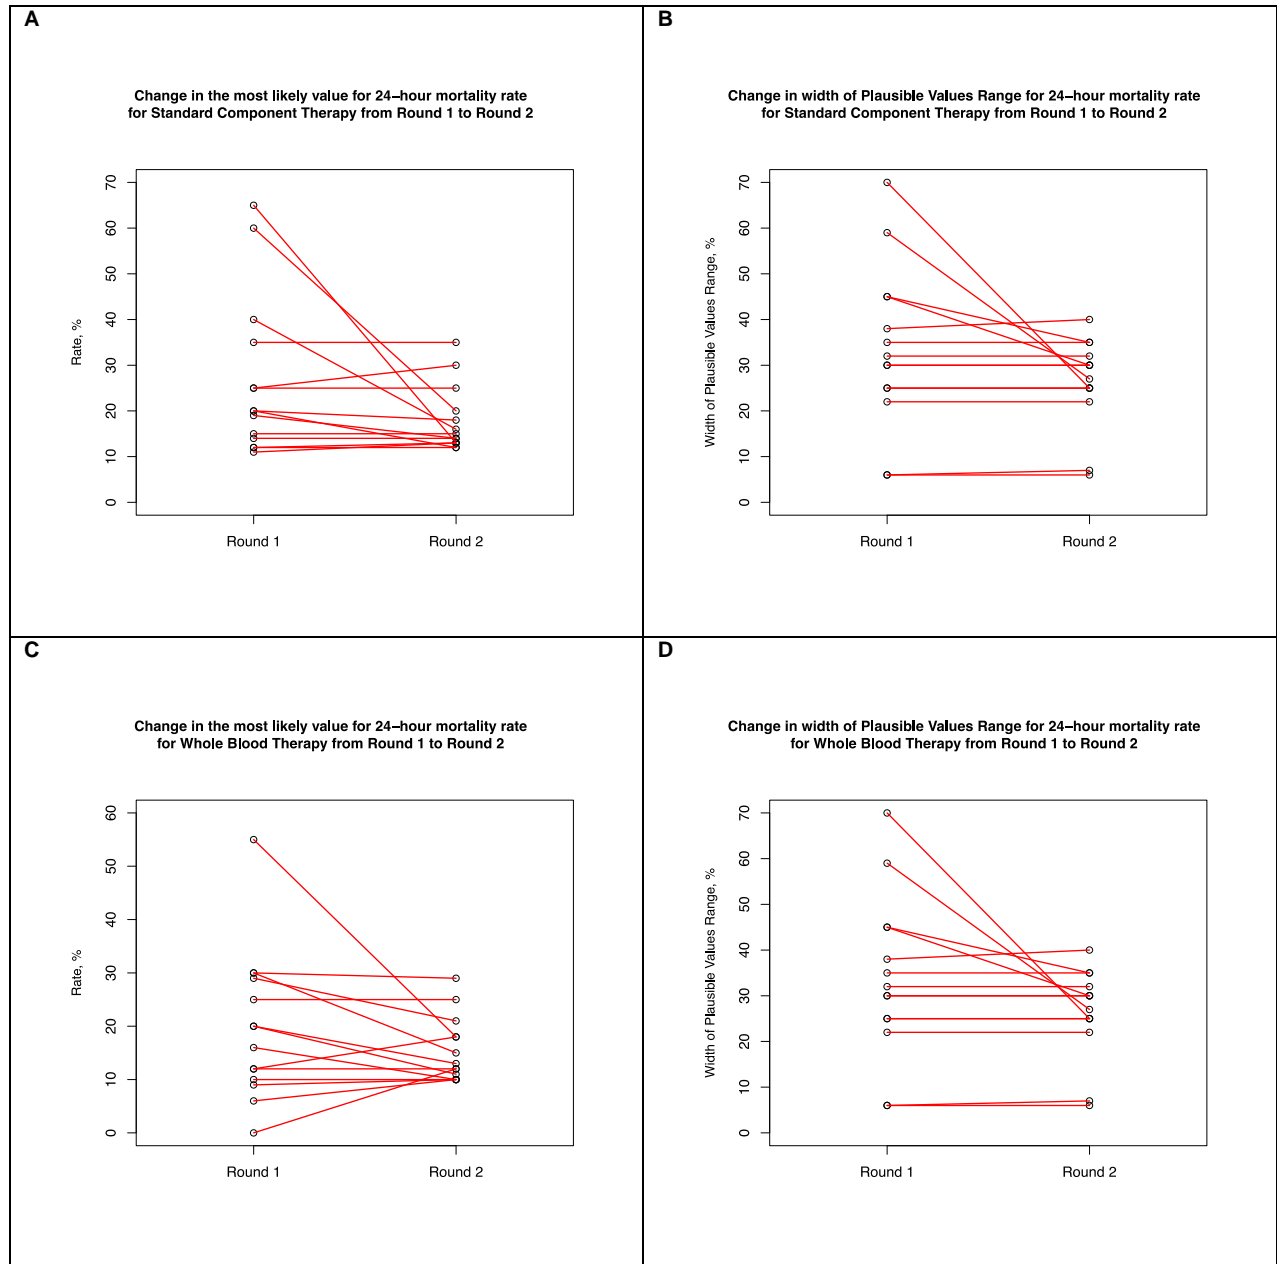

Supplement: TRF-60-498-s002.pdf [file TRF-60-498-s002.pdf]
